# Supplementary material
Source: Springer Nature journal article supplement (https://www.springermedizin.de/resource/supplementary/12970_2013_413_MOESM1_ESM.pdf/9593908)

**A)**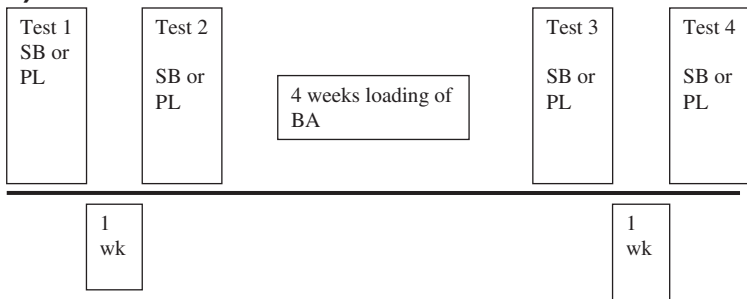**B)**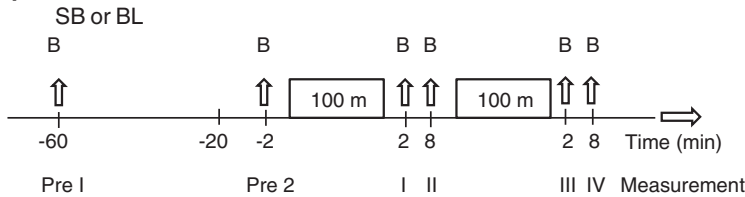

Supplement: MOESM1 [file 9593908]
